# Supplementary material for: Brg1 promotes liver regeneration after partial hepatectomy via regulation of cell cycle
Source: PubMed Central journal article supplement (PMC6382836; doi:10.1038/s41598-019-38568-w), 2019-02-20
Supplement: 41598_2019_38568_MOESM1_ESM.pdf [file 41598_2019_38568_MOESM1_ESM.pdf]

# **Brg1 promotes liver regeneration after partial hepatectomy via regulation of cell cycle**

Baocai Wang<sup>1,2</sup>, Benedikt Kaufmann<sup>1</sup>, Thomas Engleitner<sup>3</sup>, Miao Lu<sup>2</sup>, Carolin Mogler<sup>4</sup>, Victor Olsavszky<sup>5</sup>, Rupert Öllinger<sup>3</sup>, Suyang Zhong<sup>6</sup>, Cyrill Geraud<sup>5</sup>, Zhangjun Cheng<sup>2</sup>, Roland R. Rad<sup>3</sup>, Roland M. Schmid<sup>6</sup>, Helmut Friess<sup>1</sup>, Norbert Hüser<sup>1</sup>, Daniel Hartmann<sup>1+\*</sup>, Guido von Figura<sup>6+\*</sup>

1 Department of Surgery, TUM School of Medicine, Klinikum rechts der Isar, Technical University of Munich, Munich, 81675, Germany

2 Department of General Surgery, the Affiliated Zhongda Hospital, School of Medicine, Southeast University, Nanjing, 210000, China

3 Institute of Molecular Oncology and Functional Genomics, Department of Medicine II and TranslaTUM Cancer Center, Klinikum rechts der Isar, Technical University of Munich, Munich, 81675, Germany

4 Institute of Pathology, TUM School of Medicine, Klinikum rechts der Isar, Technical University of Munich, Munich, 81675, Germany

5 Department of Dermatology, Venereology, and Allergology, University Medical Center and Medical Faculty Mannheim, Heidelberg University and Center of Excellence in Dermatology, Mannheim, 68135, Germany

6 Department of Medicine II, TUM School of Medicine, Klinikum rechts der Isar, Technical University of Munich, Munich, 81675, Germany

+ These authors contributed equally

## Figure legends

### Figure S1

(A) ALT levels were measured using serum samples of 2-month-old Control and Brg1 KO mice, n=3. (B,C) Liver weight and body weight of 2-month-old Control and Brg1 KO mice, n=6. (D,F) Representative immunofluorescence images for Glutamine synthetase (GS)/Arginase-1 (Arg-1), GS/Lymphatic vessel endothelial hyaluronan receptor 1 (Lyve1)/Endomucin (Emcn) and Rh Family B Glycoprotein (Rhbg) of the liver of 2-month-old Control and Brg1 KO mice, n=3. GS und RhbG show staining pattern in pericentral hepatocytes and Arg1 in the periportal hepatocytes. Liver endothelial cells show a zonated expression pattern as well, with Endomucin (EMCN) in pericentral liver sinusoidal endothelial cells (LSECs) and central vein endothelial cells (CVECs), and LYVE1 in midzonal LSECs<sup>S1</sup>.

### Figure S2

(A) Representative H&E staining of Control and Brg1 KO mice at 40h after PH. (B) ALT levels were measured using serum samples of post-PH Control and Brg1 KO mice, n>4.

### Figure S3

Heatmap of significantly regulated cell cycle pathway related genes analysed in the liver of Control and Brg1 KO mice at 48h after PH. Shown is the z-scaled gene expression for genes, being significantly regulated between time points 0h and 48h , within both the Control and Brg1 KO group, and overlap with the cell cycle pathway annotation from Reactome.

### Figure S4

Full length gels of all Western blots shown in the figures.

## **Table Legends**

### **Table S1**

Differences in gene expression levels between time points 4h, 24h, 40h, and 48h post-PH and time point 0hrs for both Control and Brg1 KO mice. For each gene, the baseline gene expression, the log<sub>2</sub> fold change and the associated adjusted p-value is reported.

### **Table S2**

Pathway analysis results for differentially expressed genes at time points 4h, 24h, 40h and 48h post-PH compared to baseline expression pre-PH for Control and Brg1 KO mice.

### **Reference**

S1. Leibing, T, et al. Angiocrine Wnt signaling controls liver growth and metabolic maturation in mice. *Hepatology*; 10.1002/hep.29613(2017).

**Figure S1**

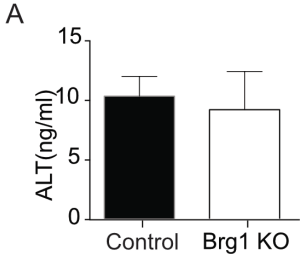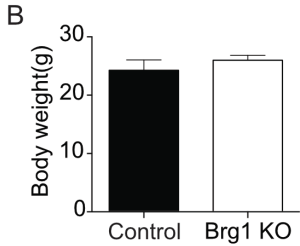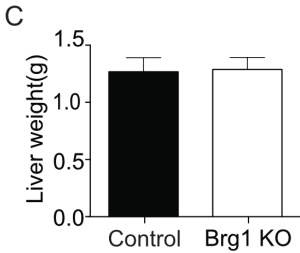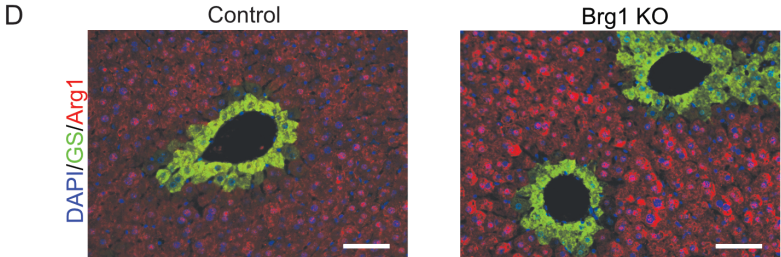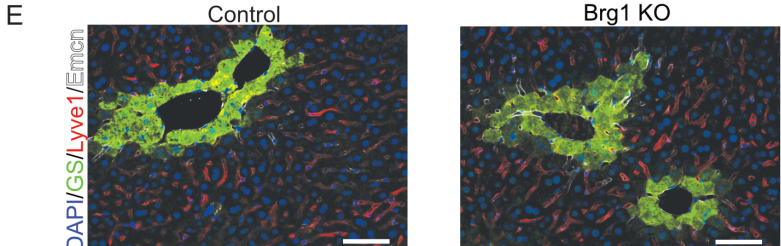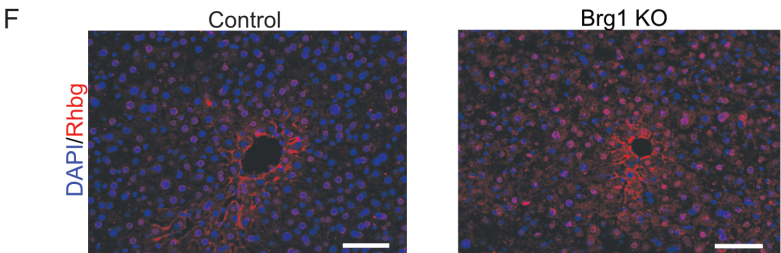

**Figure S2**

**A**

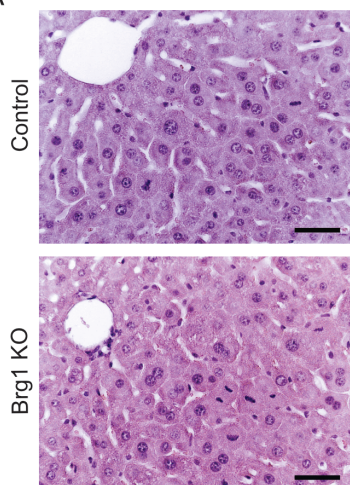

**B**

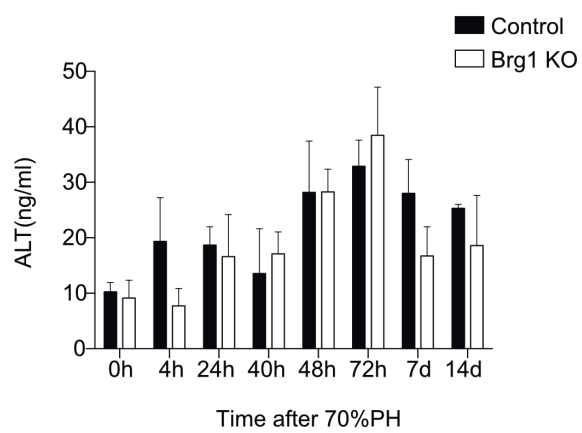

Figure S3

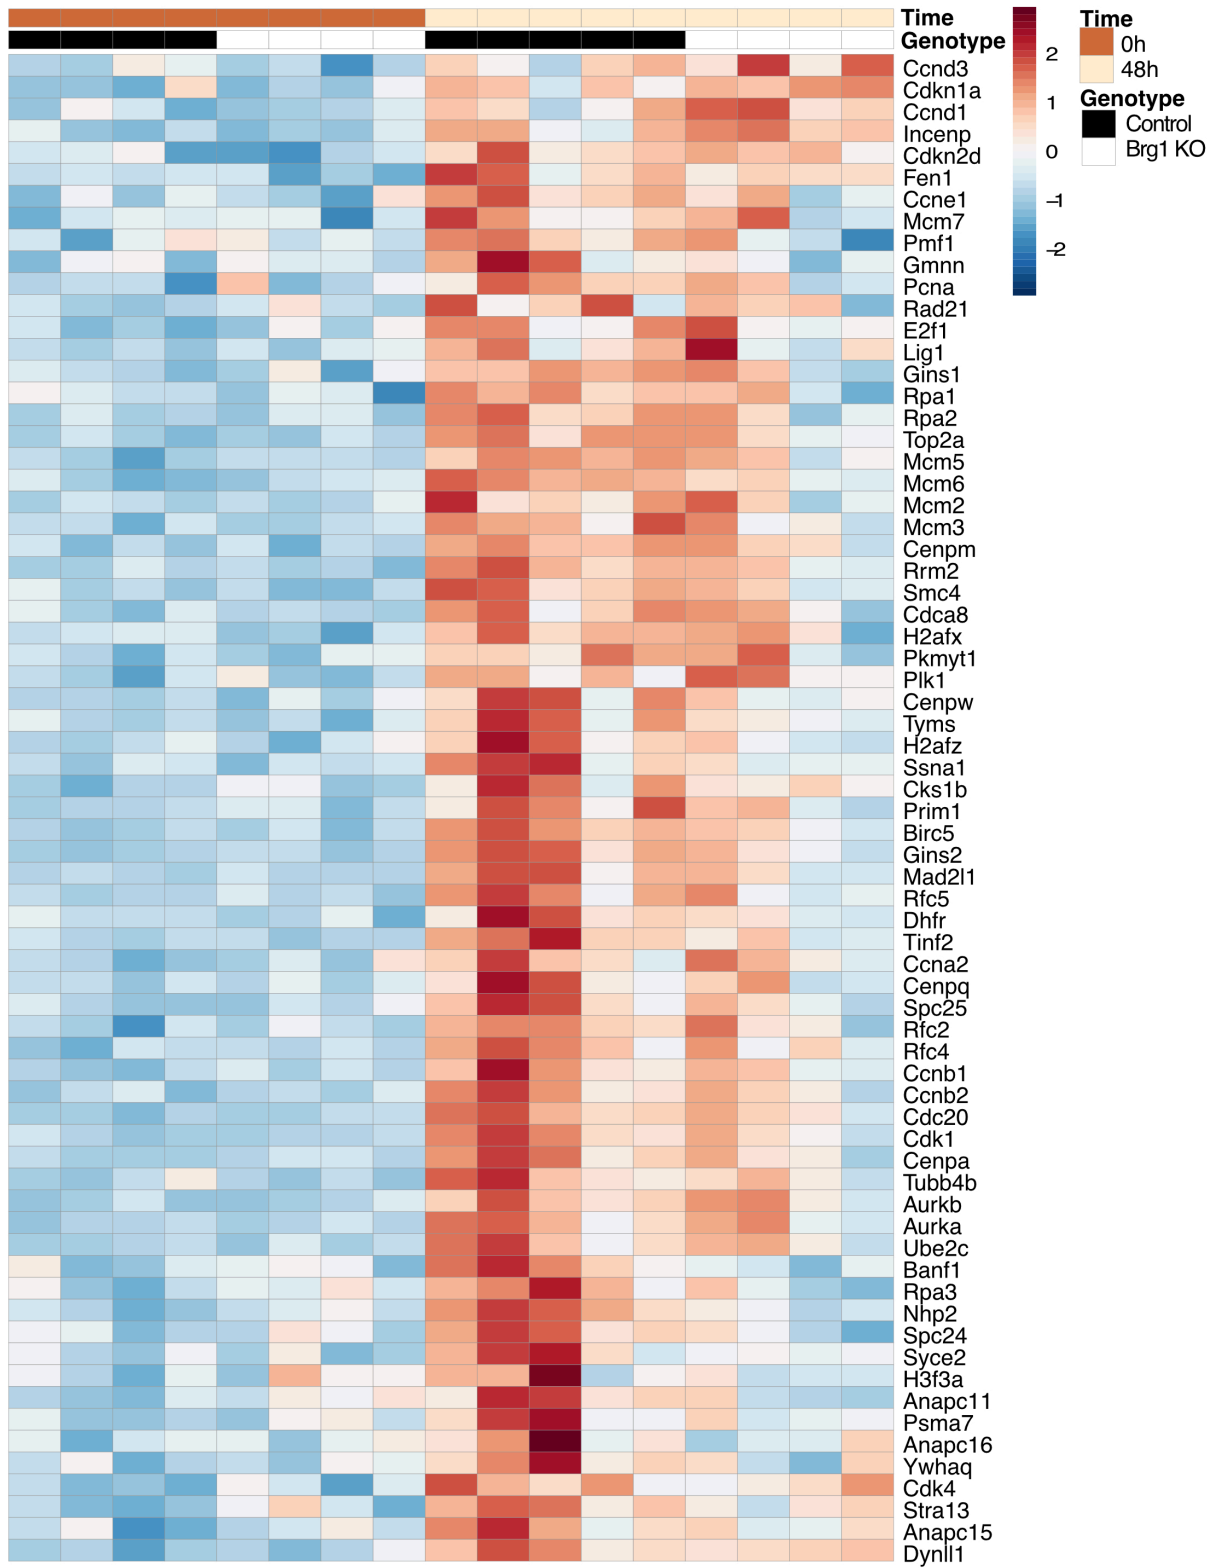

**Figure S4**

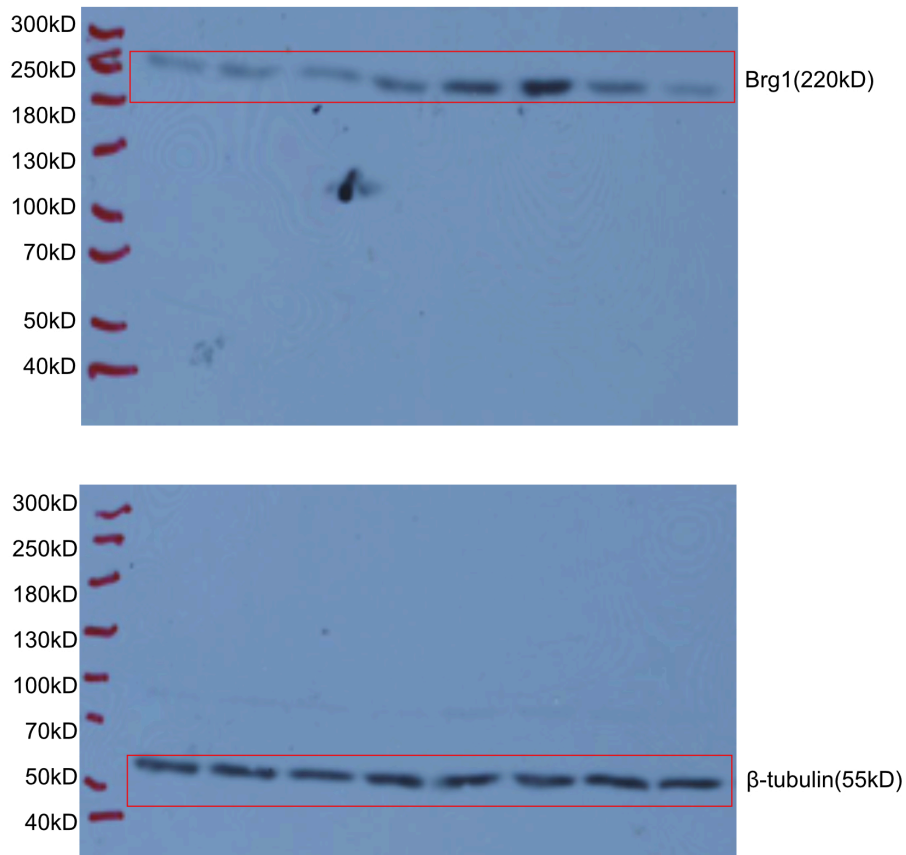

Areas of the gel shown in Figure 1A are marked in red.

The membrane was probed first with anti-Brg1 and subsequently with anti- $\beta$ -tubulin antibodies. Predicted molecular weights for Brg1 and  $\beta$ -tubulin are indicated.

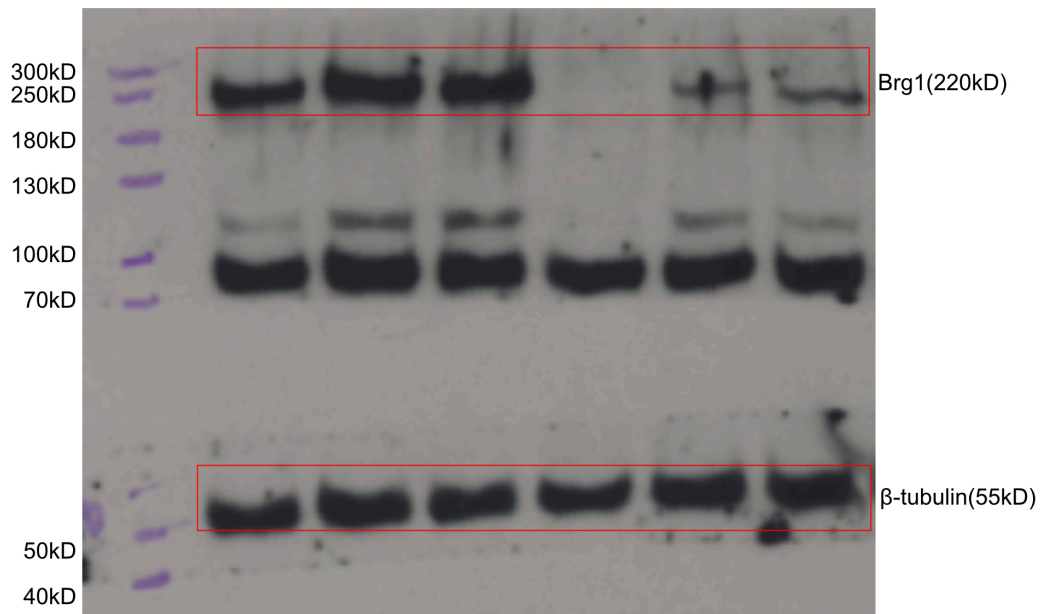

Areas of the gel shown in Figure 2A are marked in red.

The membrane was probed with anti-Brg1 and anti- $\beta$ -tubulin antibodies. Predicted molecular weights for Brg1 and  $\beta$ -tubulin are indicated.



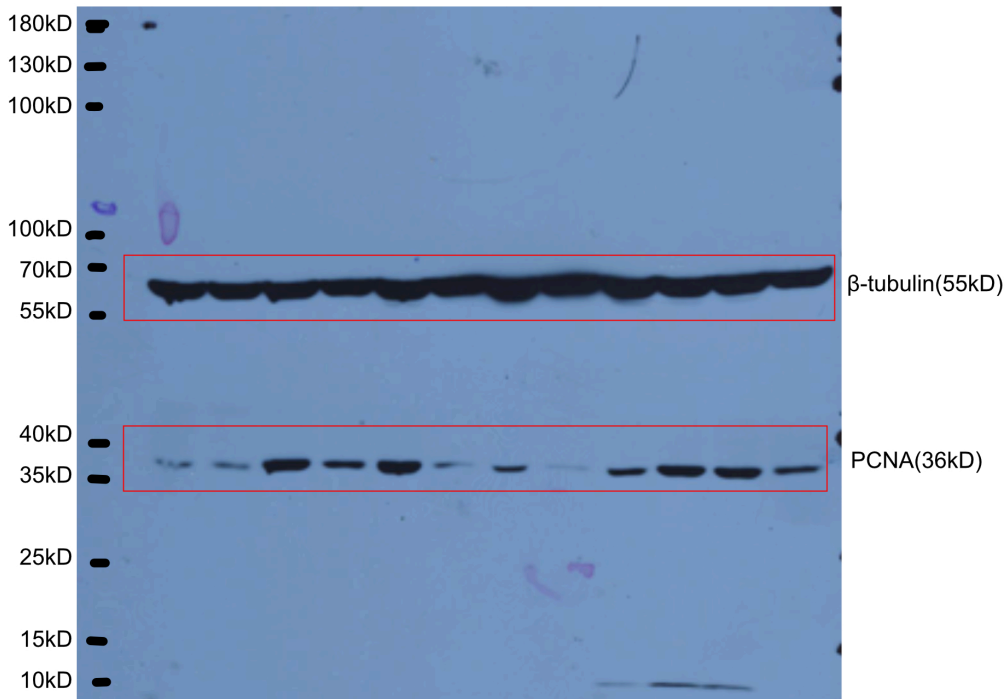

Areas of the gel shown in Figure 4A part1 are marked in red.

The membrane was probed with anti-PCNA and anti- $\beta$ -tubulin antibodies. Predicted molecular weights for PCNA and  $\beta$ -tubulin are indicated.

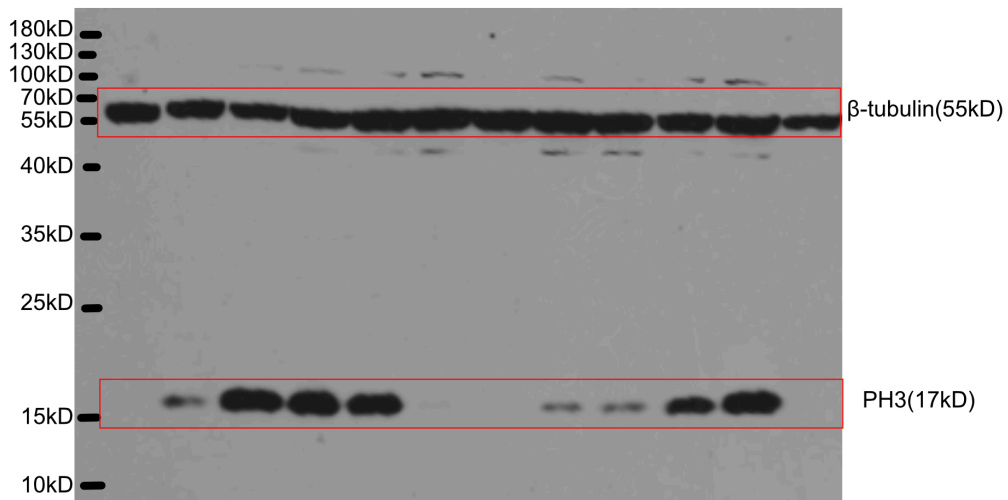

Areas of the gel shown in Figure 4A part2 are marked in red.

The membrane was probed with anti- $\beta$ -tubulin and anti-PH3 antibodies.

Predicted molecular weights for PH3 and  $\beta$ -tubulin are indicated.

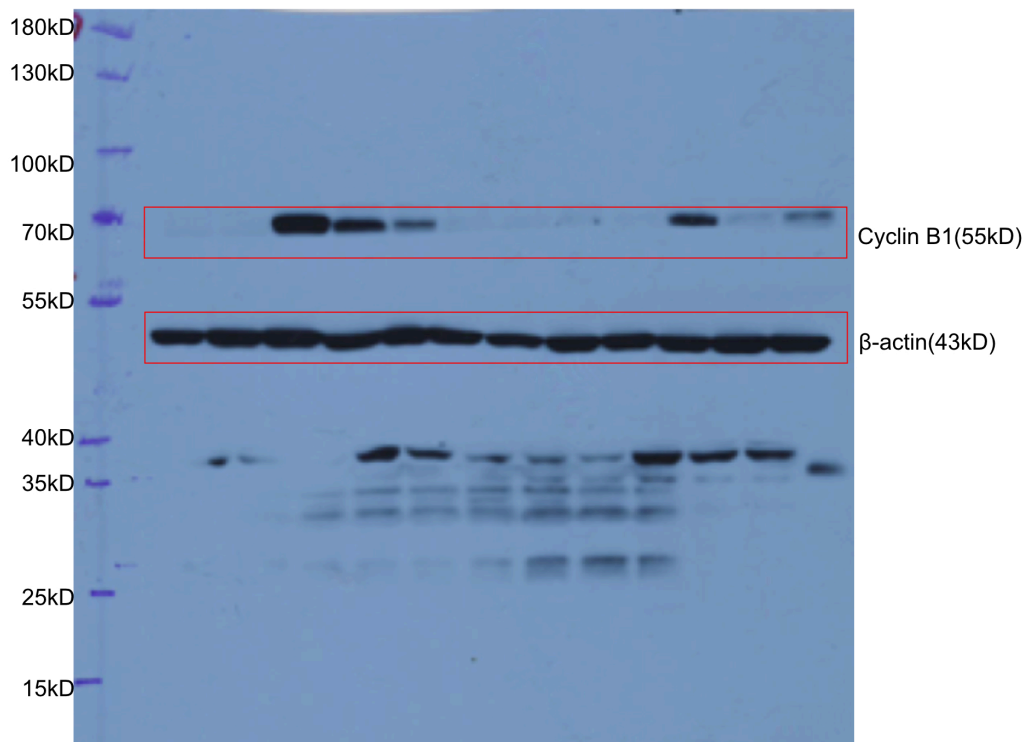

Areas of the gel shown in Figure 6B part1 are marked in red.

The membrane was probed with anti-Cyclin B1 and anti- $\beta$ -actin antibodies. Predicted molecular weights for Cyclin B1 and  $\beta$ -actin are indicated.

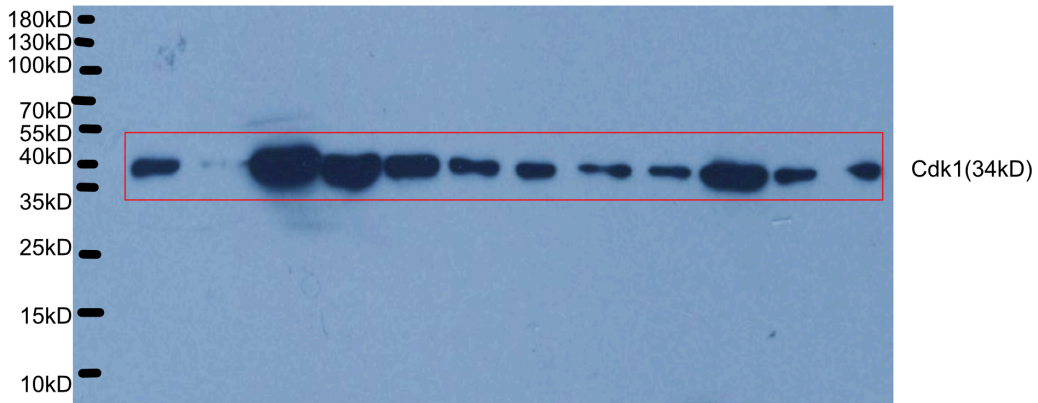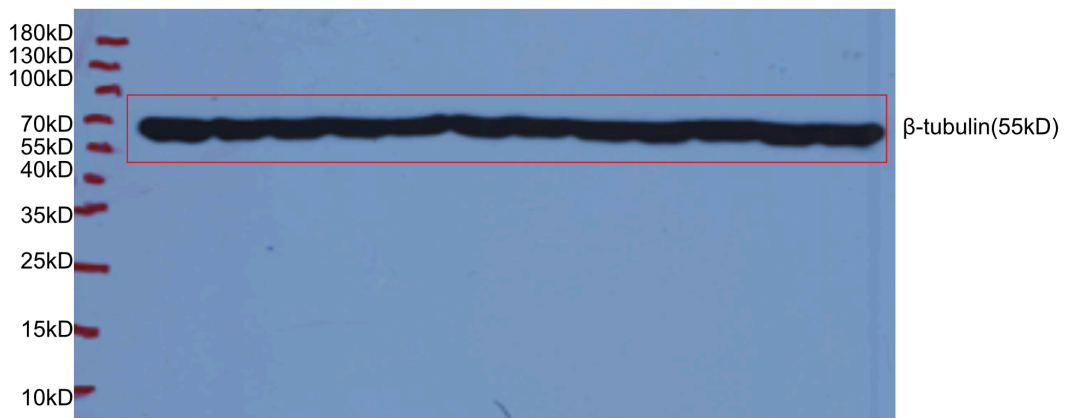

Areas of the gel shown in Figure 6B part2 are marked in red.

The membrane was probed first with anti-Cdk1 and subsequently with anti- $\beta$ -tubulin antibodies. Predicted molecular weights for Cdk1 and  $\beta$ -tubulin are indicated.

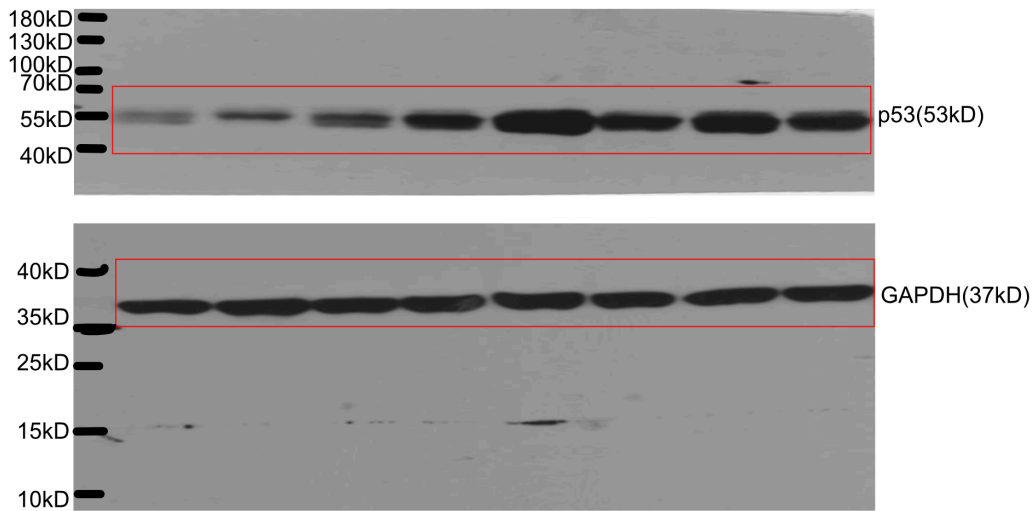

Areas of the gel shown in Figure 7B are marked in red.

The membrane was probed with anti-p53 and anti-GAPDH antibodies. Predicted molecular weights for p53 and GAPDH are indicated.
